# Supplementary material
Source: publisher figshare collection journal article supplement (https://future-science-group.figshare.com/ndownloader/files/30793513)
Supplement: Supplementary file 1 [file 30793513]

| **Supplementary Table 2. Biochemical parameters after treatments in a rat glioma model pilot experiment** | | | | |
| --- | --- | --- | --- | --- |
| Biochemical parameters | CTRL | BZP-LNC+ | TMZ | TMZ  +  BZP-LNC+ | |
| Creatinine  (mg·mL-1) | 0.49 ± 0.05 | 0.48 ± 0.16 | 0.49 ± 0.05 | 0.45 ± 0.02 | |
| Urea  (mg·dL-1) | 49.00 ± 4.82 | 44.25 ± 4.35 | 46.50 ± 3.11 | 44.00 ± 8.29 | |
| ALP  (U·L-1) | 261.50 ± 85.25 | 234.50 ± 108.7 | 204.80 ± 73.37 | 307.71 ± 46.82 | |
| CPK  (U·L-1) | 6271 ± 2428 | 4765 ± 2258 | 7182 ± 3215 | 5213 ± 3616 | |
| ALT  (U·L-1) | 51.50 ± 5.69 | 71.25 ± 19.31 | 54.75 ± 6.75 | 69.75 ± 2.17 | |
| AST  (U·L-1) | 176.10 ± 17.83 | 180.85 ± 41.87 | 200.60 ± 31.93 | 243.50 ± 58.67 | |
| *Abbreviations:* alkaline phosphatase (ALP), creatine phosphokinase (CPK), alanine aminotransferase (ALT) and aspartate aminotransferase (AST).  *Notes:* Values are expressed as mean ± S.D. of 4 animals/group to each parameter. | | | | |
